# Supplementary material for: Modification of CuCl2·2H2O by dielectric barrier discharge and its application in the hydroxylation of benzene
Source: Royal Society of Chemistry journal article supplement (doi:10.1039/c9nj03261d), 2019-01-01
Supplement: c9nj03261d1.pdf [file c9nj03261d1.pdf]

Electronic Supplementary Material (ESI) for New Journal of Chemistry

**Modification of  $\text{CuCl}_2 \cdot 2\text{H}_2\text{O}$  by dielectric barrier discharge and its  
application in hydroxylation of benzene**

**Lu Fang, Shi Yang Dong, Lei Shi, Qi Sun\***

*Faculty of Chemistry and Chemical Engineering, Liaoning Normal University, Dalian 116029,  
China*

\* Corresponding author. Tel.: +86-0411-84259069; Fax: +86-0411-82156989

*E-mail address:* [sunqils@163.com](mailto:sunqils@163.com) (Q. Sun)

**Table S1 Structural parameters of samples**

| Sample                  | Specific surface area(m <sup>2</sup> /g)(BET) | Pore volume(cm <sup>3</sup> /g) | Pore diameter(nm)(BJH) |
|-------------------------|-----------------------------------------------|---------------------------------|------------------------|
| CuCl <sub>2</sub> -pure | 16.1                                          | 0.07                            | 3.92                   |
| CuCl <sub>2</sub> -DBD  | 9.4                                           | 3.28                            | 3.93                   |

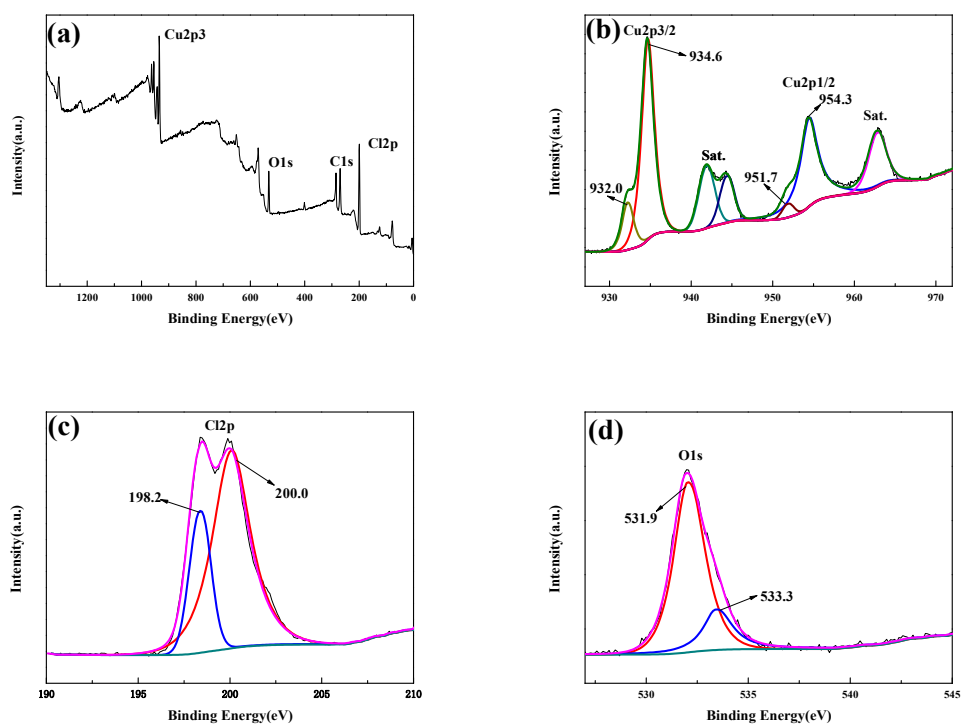

**Figure S1 XPS spectra of CuCl<sub>2</sub>-pure**

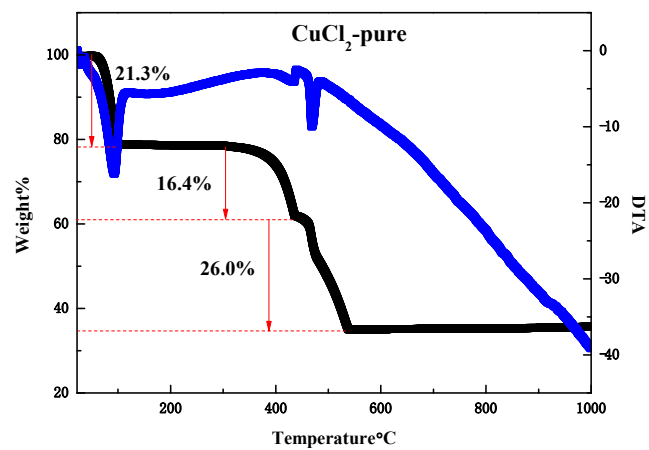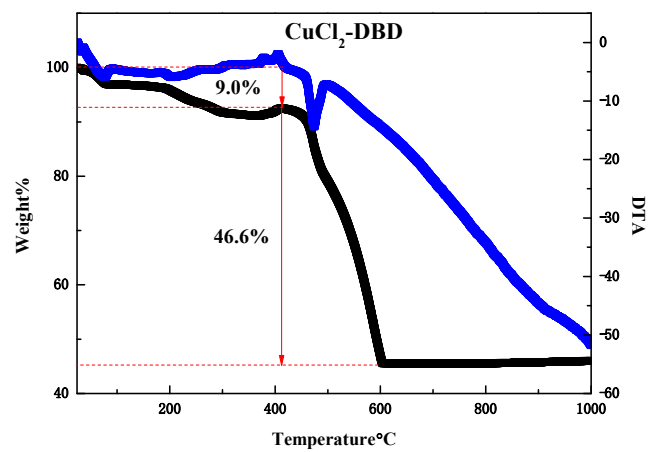

Figure S2 TG-DTA analysis of CuCl<sub>2</sub>-pure and CuCl<sub>2</sub>-DBD

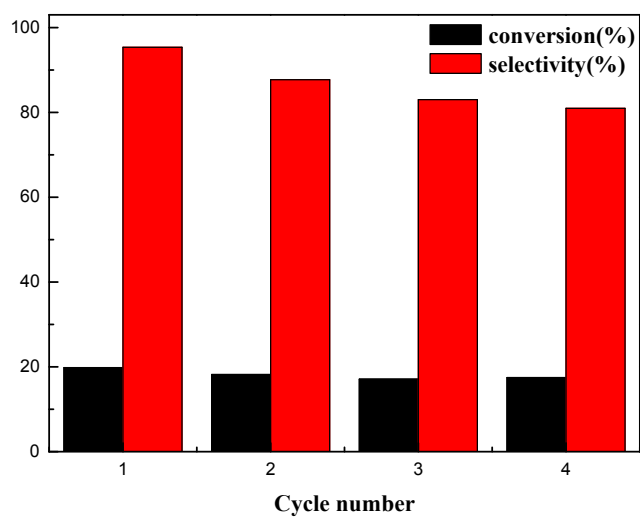

**Figure S3 Effect of reused catalyst on hydroxylation of benzene to phenol**  
 Reaction conditions: catalyst 10mg, benzene 1mL, CH<sub>3</sub>CN 5mL, 30% H<sub>2</sub>O<sub>2</sub> 2mL, 65°C, 4h

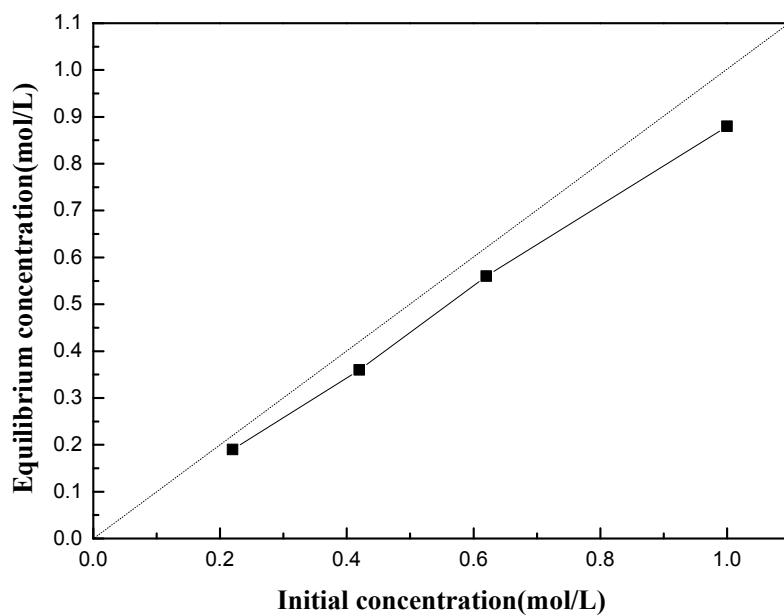

**Figure S4 The relationship between initial and equilibrium concentrations of benzene on CuCl<sub>2</sub>-DBD**

**Table S2 Effect of CuCl<sub>2</sub>-pure and CuCl<sub>2</sub>-DBD on hydroxylation of benzene to phenol**

| Catalyst                | Solubility                | Benzene conversion[%] | Phenol yield[%] | Phenol selectivity[%] |
|-------------------------|---------------------------|-----------------------|-----------------|-----------------------|
| CuCl <sub>2</sub> -pure | dissolve in acetonitrile  | 19.7                  | 15.1            | 77.1                  |
| CuCl <sub>2</sub> -DBD  | insoluble in acetonitrile | 20.0                  | 19.1            | 95.6                  |

Reaction conditions: catalyst 10mg, benzene 1mL, CH<sub>3</sub>CN 5mL, 30% H<sub>2</sub>O<sub>2</sub> 2mL, 65°C, 4h

**Table S3 CuCl<sub>2</sub>-DBD and CuCl<sub>2</sub>-pure in different temperature for H<sub>2</sub>O<sub>2</sub> decomposition**

| Temperature (°C) | CuCl <sub>2</sub> -pure             |                | CuCl <sub>2</sub> -DBD              |                |
|------------------|-------------------------------------|----------------|-------------------------------------|----------------|
|                  | Fitting rate equation               | R <sup>2</sup> | Fitting rate equation               | R <sup>2</sup> |
| 50               | $\ln(V_{\infty}-V_t)=-1.518t+12.82$ | 0.9941         | $\ln(V_{\infty}-V_t)=-0.0078t+2.81$ | 0.9869         |
| 55               | $\ln(V_{\infty}-V_t)=-2.716t+18.47$ | 0.9873         | $\ln(V_{\infty}-V_t)=-0.018t+2.29$  | 0.9870         |
| 60               | $\ln(V_{\infty}-V_t)=-3.649t+15.79$ | 0.9844         | $\ln(V_{\infty}-V_t)=-0.038t+2.54$  | 0.9800         |
| 65               | $\ln(V_{\infty}-V_t)=-4.478t+11.14$ | 0.9947         | $\ln(V_{\infty}-V_t)=-0.081t+2.44$  | 0.9814         |

Reaction condition: 2mg catalyst / 5mLCH<sub>3</sub>CN / 1mLH<sub>2</sub>O<sub>2</sub> (30%)
